# Supplementary material
Source: MDPI journal article supplement (https://www.mdpi.com/2071-1050/13/12/6815)
Supplement: s1 [file s1]

# Municipal Wastewater Reuse: Is it a Competitive Alternative to Seawater Desalination?

Dafne Crutchik \* and José Luis Campos

Faculty of Engineering and Sciences, Universidad Adolfo Ibáñez, Av. Diagonal Las Torres 2640, 7941169 Santiago, Chile; jluis.campos@uai.cl

\* Correspondence: dafne.crutchik@uai.cl; Tel.: +56-(2)-2331-1934

**Table S1.** Capital costs (MUSD) to produce water from municipal wastewater by a UF-RO system (scenario 1).

| Water Production Capacity (m <sup>3</sup> /d) | UF System Cost | RO System Cost | Yard Piping | Sitework Landscaping | Site Electrical and Controls | Total Capital Costs |
|-----------------------------------------------|----------------|----------------|-------------|----------------------|------------------------------|---------------------|
| 100,000                                       | 18,211         | 36,405         | 5,464       | 2,725                | 10,931                       | 73,735              |
| 90,000                                        | 16,596         | 33,177         | 4,979       | 2,484                | 9,961                        | 67,197              |
| 80,000                                        | 14,981         | 29,950         | 4,493       | 2,243                | 8,992                        | 60,658              |
| 70,000                                        | 13,366         | 26,723         | 4,008       | 2,001                | 8,022                        | 54,120              |
| 60,000                                        | 11,751         | 23,495         | 3,523       | 1,760                | 7,053                        | 47,582              |
| 50,000                                        | 10,136         | 20,268         | 3,038       | 1,519                | 6,084                        | 41,043              |
| 45,000                                        | 9,328          | 18,654         | 2,795       | 1,398                | 5,599                        | 37,774              |
| 40,000                                        | 8,521          | 17,040         | 2,553       | 1,277                | 5,114                        | 34,505              |
| 35,000                                        | 7,713          | 15,427         | 2,310       | 1,157                | 4,629                        | 31,236              |
| 30,000                                        | 6,906          | 13,813         | 2,068       | 1,036                | 4,145                        | 27,967              |
| 25,000                                        | 6,098          | 12,199         | 1,825       | 915                  | 3,660                        | 24,698              |
| 20,000                                        | 5,291          | 10,586         | 1,582       | 795                  | 3,175                        | 21,429              |
| 15,000                                        | 4,483          | 8,972          | 1,340       | 674                  | 2,691                        | 18,160              |
| 10,000                                        | 3,676          | 7,358          | 1,097       | 553                  | 2,206                        | 14,890              |
| 7,500                                         | 3,272          | 6,551          | 976         | 493                  | 1,964                        | 13,256              |
| 5,000                                         | 2,868          | 5,745          | 855         | 433                  | 1,721                        | 11,621              |
| 4,000                                         | 2,707          | 5,422          | 806         | 409                  | 1,624                        | 10,968              |
| 3,000                                         | 2,545          | 5,099          | 758         | 384                  | 1,527                        | 10,314              |
| 2,000                                         | 2,384          | 4,776          | 709         | 360                  | 1,430                        | 9,660               |
| 1,500                                         | 2,303          | 4,615          | 685         | 348                  | 1,382                        | 9,333               |
| 1,000                                         | 2,222          | 4,454          | 660         | 336                  | 1,333                        | 9,006               |
| 500                                           | 2,141          | 4,292          | 636         | 324                  | 1,285                        | 8,679               |

**Table S2.** Capital costs (MUSD) to produce water from municipal wastewater by an activated sludge unite followed by a UF-RO system (scenario 2).

| Water Production Capacity (m <sup>3</sup> /d) | UF System Cost | RO System Cost | Yard Piping | Sitework Landscaping | Site Electrical and Controls | Activated Sludge | Total Capital Costs |
|-----------------------------------------------|----------------|----------------|-------------|----------------------|------------------------------|------------------|---------------------|
| 100,000                                       | 18,211         | 36,405         | 5,464       | 2,725                | 10,931                       | 67,514           | 141,249             |
| 90,000                                        | 16,596         | 33,177         | 4,979       | 2,484                | 9,961                        | 60,833           | 128,030             |
| 80,000                                        | 14,981         | 29,950         | 4,493       | 2,243                | 8,992                        | 54,178           | 114,836             |
| 70,000                                        | 13,366         | 26,723         | 4,008       | 2,001                | 8,022                        | 47,546           | 101,666             |
| 60,000                                        | 11,751         | 23,495         | 3,523       | 1,760                | 7,053                        | 40,936           | 88,517              |
| 50,000                                        | 10,136         | 20,268         | 3,038       | 1,519                | 6,084                        | 34,343           | 75,387              |
| 45,000                                        | 9,328          | 18,654         | 2,795       | 1,398                | 5,599                        | 31,052           | 68,826              |
| 40,000                                        | 8,521          | 17,040         | 2,553       | 1,277                | 5,114                        | 27,762           | 62,267              |
| 35,000                                        | 7,713          | 15,427         | 2,310       | 1,157                | 4,629                        | 24,471           | 55,707              |
| 30,000                                        | 6,906          | 13,813         | 2,068       | 1,036                | 4,145                        | 21,177           | 49,144              |
| 25,000                                        | 6,098          | 12,199         | 1,825       | 915                  | 3,660                        | 17,875           | 42,573              |
| 20,000                                        | 5,291          | 10,586         | 1,582       | 795                  | 3,175                        | 14,558           | 35,987              |
| 15,000                                        | 4,483          | 8,972          | 1,340       | 674                  | 2,691                        | 11,215           | 29,374              |
| 10,000                                        | 3,676          | 7,358          | 1,097       | 553                  | 2,206                        | 7,818            | 22,709              |
| 7,500                                         | 3,272          | 6,551          | 976         | 493                  | 1,964                        | 6,084            | 19,340              |
| 5,000                                         | 2,868          | 5,745          | 855         | 433                  | 1,721                        | 4,303            | 15,924              |
| 4,000                                         | 2,707          | 5,422          | 806         | 409                  | 1,624                        | 3,570            | 14,537              |
| 3,000                                         | 2,545          | 5,099          | 758         | 384                  | 1,527                        | 2,817            | 13,130              |
| 2,000                                         | 2,384          | 4,776          | 709         | 360                  | 1,430                        | 2,032            | 11,692              |
| 1,500                                         | 2,303          | 4,615          | 685         | 348                  | 1,382                        | 1,188            | 10,521              |
| 1,000                                         | 2,222          | 4,454          | 660         | 336                  | 1,333                        | 1,188            | 10,194              |
| 500                                           | 2,141          | 4,292          | 636         | 324                  | 1,285                        | 714              | 9,393               |

**Table S3.** Capital costs (MUSD) to produce water by the desalination of seawater (scenario 3).

| <b>Water Production Capacity (m<sup>3</sup>/d)</b> | <b>Construction and Infrastructure</b> | <b>Land Acquisition</b> | <b>Engineering</b> | <b>Development and Managements</b> | <b>Total</b> |
|----------------------------------------------------|----------------------------------------|-------------------------|--------------------|------------------------------------|--------------|
| 100,000                                            | 186,113                                | 3,723                   | 6,522              | 935                                | 197,293      |
| 90,000                                             | 168,122                                | 3,363                   | 5,891              | 845                                | 178,221      |
| 80,000                                             | 150,130                                | 3,003                   | 5,261              | 754                                | 159,148      |
| 70,000                                             | 132,139                                | 2,643                   | 4,630              | 664                                | 140,076      |
| 60,000                                             | 114,147                                | 2,283                   | 4,000              | 573                                | 121,003      |
| 50,000                                             | 96,156                                 | 1,923                   | 3,369              | 483                                | 101,931      |
| 45,000                                             | 87,160                                 | 1,743                   | 3,054              | 438                                | 92,394       |
| 40,000                                             | 78,164                                 | 1,563                   | 2,738              | 392                                | 82,858       |
| 35,000                                             | 69,169                                 | 1,383                   | 2,423              | 347                                | 73,322       |
| 30,000                                             | 60,173                                 | 1,203                   | 2,108              | 302                                | 63,786       |
| 25,000                                             | 51,177                                 | 1,023                   | 1,793              | 256                                | 54,249       |
| 20,000                                             | 42,181                                 | 843                     | 1,477              | 211                                | 44,713       |
| 15,000                                             | 33,186                                 | 663                     | 1,162              | 166                                | 35,177       |
| 10,000                                             | 24,190                                 | 484                     | 847                | 121                                | 25,641       |
| 7,500                                              | 19,692                                 | 394                     | 689                | 98                                 | 20,873       |
| 5,000                                              | 15,194                                 | 304                     | 531                | 75                                 | 16,105       |
| 4,000                                              | 13,395                                 | 268                     | 468                | 66                                 | 14,197       |
| 3,000                                              | 11,596                                 | 232                     | 405                | 57                                 | 12,290       |
| 2,000                                              | 9,797                                  | 196                     | 342                | 48                                 | 10,383       |
| 1,500                                              | 8,897                                  | 178                     | 311                | 44                                 | 9,429        |
| 1,000                                              | 7,998                                  | 160                     | 279                | 39                                 | 8,476        |
| 500                                                | 7,098                                  | 142                     | 248                | 35                                 | 7,522        |

**Table S4.** Operating and maintenance costs (MUSD/year) to produce water from municipal wastewater by a UF-RO system (scenario 1).

| Water<br>Production<br>Capacity (m <sup>3</sup> /d) | UF-RO system |                |                               |              |                |                               |              | Total  |
|-----------------------------------------------------|--------------|----------------|-------------------------------|--------------|----------------|-------------------------------|--------------|--------|
|                                                     | Labor        | Reagents<br>UF | Membrane<br>Replacement<br>UF | Energy<br>UF | Reagents<br>RO | Membrane<br>Replacement<br>RO | Energy<br>RO |        |
| 100,000                                             | 1,043        | 2,684          | 1,069                         | 473          | 2,710          | 1,052                         | 4,722        | 13,753 |
| 90,000                                              | 939          | 2,418          | 963                           | 426          | 2,441          | 948                           | 4,247        | 12,381 |
| 80,000                                              | 834          | 2,152          | 856                           | 378          | 2,171          | 844                           | 3,772        | 11,008 |
| 70,000                                              | 730          | 1,887          | 750                           | 330          | 1,902          | 739                           | 3,298        | 9,636  |
| 60,000                                              | 626          | 1,621          | 643                           | 282          | 1,633          | 635                           | 2,823        | 8,263  |
| 50,000                                              | 521          | 1,355          | 537                           | 234          | 1,364          | 531                           | 2,348        | 6,891  |
| 45,000                                              | 469          | 1,222          | 483                           | 211          | 1,229          | 479                           | 2,111        | 6,205  |
| 40,000                                              | 417          | 1,089          | 430                           | 187          | 1,095          | 427                           | 1,874        | 5,518  |
| 35,000                                              | 365          | 956            | 377                           | 163          | 960            | 375                           | 1,636        | 4,832  |
| 30,000                                              | 313          | 823            | 324                           | 139          | 826            | 323                           | 1,399        | 4,146  |
| 25,000                                              | 261          | 690            | 270                           | 115          | 691            | 270                           | 1,161        | 3,459  |
| 20,000                                              | 209          | 558            | 217                           | 91           | 557            | 218                           | 924          | 2,773  |
| 15,000                                              | 156          | 425            | 164                           | 67           | 422            | 166                           | 687          | 2,087  |
| 10,000                                              | 104          | 292            | 110                           | 43           | 287            | 114                           | 449          | 1,401  |
| 7,500                                               | 78           | 225            | 84                            | 31           | 220            | 88                            | 331          | 1,058  |
| 5,000                                               | 52           | 159            | 57                            | 19           | 153            | 62                            | 212          | 714    |
| 4,000                                               | 42           | 132            | 46                            | 15           | 126            | 52                            | 165          | 577    |
| 3,000                                               | 31           | 106            | 36                            | 10           | 99             | 41                            | 117          | 440    |
| 2,000                                               | 21           | 79             | 25                            | 5            | 72             | 31                            | 70           | 303    |
| 1,500                                               | 16           | 66             | 20                            | 3            | 59             | 26                            | 46           | 234    |
| 1,000                                               | 10           | 52             | 14                            | 3            | 45             | 20                            | 35           | 180    |
| 500                                                 | 5            | 39             | 9                             | 1            | 32             | 15                            | 17           | 119    |

**Table S5.** Operating and maintenance costs (MUSD/year) to produce water from municipal wastewater by an activated sludge unite followed by a UF-RO system (scenario 2).

| Water Production Capacity (m <sup>3</sup> /d) | UF-RO System |             |                         |           |             |                         |           | Activated Sludge System |       |          |                  |             | Total  |
|-----------------------------------------------|--------------|-------------|-------------------------|-----------|-------------|-------------------------|-----------|-------------------------|-------|----------|------------------|-------------|--------|
|                                               | Labor        | Reagents UF | Membrane Replacement UF | Energy UF | Reagents RO | Membrane Replacement RO | Energy RO | Energy                  | Labor | Reagents | Waste Management | Maintenance |        |
| 100,000                                       | 1,043        | 2,684       | 1,069                   | 473       | 2,710       | 1,052                   | 4,722     | 1,728                   | 3,139 | 1,327    | 1,508            | 1,997       | 23,452 |
| 90,000                                        | 939          | 2,418       | 963                     | 426       | 2,441       | 948                     | 4,247     | 1,555                   | 2,825 | 1,194    | 1,357            | 1,797       | 21,110 |
| 80,000                                        | 834          | 2,152       | 856                     | 378       | 2,171       | 844                     | 3,772     | 1,383                   | 2,511 | 1,062    | 1,206            | 1,598       | 18,767 |
| 70,000                                        | 730          | 1,887       | 750                     | 330       | 1,902       | 739                     | 3,298     | 1,210                   | 2,197 | 929      | 1,055            | 1,398       | 16,425 |
| 60,000                                        | 626          | 1,621       | 643                     | 282       | 1,633       | 635                     | 2,823     | 1,037                   | 1,883 | 796      | 905              | 1,198       | 14,083 |
| 50,000                                        | 521          | 1,355       | 537                     | 234       | 1,364       | 531                     | 2,348     | 864                     | 1,569 | 663      | 754              | 999         | 11,740 |
| 45,000                                        | 469          | 1,222       | 483                     | 211       | 1,229       | 479                     | 2,111     | 778                     | 1,413 | 597      | 678              | 899         | 10,569 |
| 40,000                                        | 417          | 1,089       | 430                     | 187       | 1,095       | 427                     | 1,874     | 691                     | 1,256 | 531      | 603              | 799         | 9,398  |
| 35,000                                        | 365          | 956         | 377                     | 163       | 960         | 375                     | 1,636     | 605                     | 1,099 | 464      | 528              | 699         | 8,227  |
| 30,000                                        | 313          | 823         | 324                     | 139       | 826         | 323                     | 1,399     | 518                     | 942   | 398      | 452              | 599         | 7,055  |
| 25,000                                        | 261          | 690         | 270                     | 115       | 691         | 270                     | 1,161     | 432                     | 785   | 332      | 377              | 499         | 5,884  |
| 20,000                                        | 209          | 558         | 217                     | 91        | 557         | 218                     | 924       | 346                     | 628   | 265      | 302              | 399         | 4,713  |
| 15,000                                        | 156          | 425         | 164                     | 67        | 422         | 166                     | 687       | 259                     | 471   | 199      | 226              | 300         | 3,542  |
| 10,000                                        | 104          | 292         | 110                     | 43        | 287         | 114                     | 449       | 173                     | 314   | 133      | 151              | 200         | 2,371  |
| 7,500                                         | 78           | 225         | 84                      | 31        | 220         | 88                      | 331       | 130                     | 235   | 100      | 113              | 150         | 1,785  |
| 5,000                                         | 52           | 159         | 57                      | 19        | 153         | 62                      | 212       | 86                      | 157   | 66       | 75               | 100         | 1,199  |
| 4,000                                         | 42           | 132         | 46                      | 15        | 126         | 52                      | 165       | 69                      | 126   | 53       | 60               | 80          | 965    |
| 3,000                                         | 31           | 106         | 36                      | 10        | 99          | 41                      | 117       | 52                      | 94    | 40       | 45               | 60          | 731    |
| 2,000                                         | 21           | 79          | 25                      | 5         | 72          | 31                      | 70        | 35                      | 63    | 27       | 30               | 40          | 497    |
| 1,500                                         | 16           | 66          | 20                      | 3         | 59          | 26                      | 46        | 26                      | 47    | 20       | 23               | 30          | 379    |
| 1,000                                         | 10           | 52          | 14                      | 3         | 45          | 20                      | 35        | 17                      | 31    | 13       | 15               | 20          | 277    |
| 500                                           | 5            | 39          | 9                       | 1         | 32          | 15                      | 17        | 9                       | 16    | 7        | 8                | 10          | 168    |

**Table S6.** Operating and maintenance costs (MUSD/year) to produce water by the desalination of seawater (scenario 3).

| Water Production Capacity (m <sup>3</sup> /d) | Energy Consumption | Membrane Replacement | Maintenance | Reagents | Labour | Other Costs | Total  |
|-----------------------------------------------|--------------------|----------------------|-------------|----------|--------|-------------|--------|
| 100,000                                       | 22,740             | 5,840                | 2.0         | 2,920    | 1,460  | 1.3         | 32,963 |
| 90,000                                        | 20,466             | 5,256                | 2.6         | 2,628    | 1,314  | 1.7         | 29,668 |
| 80,000                                        | 18,192             | 4,672                | 3.2         | 2,336    | 1,168  | 2.1         | 26,373 |
| 70,000                                        | 15,918             | 4,088                | 3.8         | 2,044    | 1,022  | 2.5         | 23,078 |
| 60,000                                        | 13,644             | 3,504                | 4.3         | 1,752    | 876    | 2.9         | 19,783 |
| 50,000                                        | 11,370             | 2,920                | 4.9         | 1,460    | 730    | 3.3         | 16,488 |
| 45,000                                        | 10,233             | 2,628                | 5.2         | 1,314    | 657    | 3.5         | 14,840 |
| 40,000                                        | 9,096              | 2,336                | 5.5         | 1,168    | 584    | 3.7         | 13,193 |
| 35,000                                        | 7,959              | 2,044                | 5.8         | 1,022    | 511    | 3.9         | 11,546 |
| 30,000                                        | 6,822              | 1,752                | 6.1         | 876      | 438    | 4.1         | 9,898  |
| 25,000                                        | 5,685              | 1,460                | 6.4         | 730      | 365    | 4.3         | 8,251  |
| 20,000                                        | 4,548              | 1,168                | 6.7         | 584      | 292    | 4.5         | 6,603  |
| 15,000                                        | 3,411              | 876                  | 7.0         | 438      | 219    | 4.7         | 4,956  |
| 10,000                                        | 2,274              | 584                  | 7.3         | 292      | 146    | 4.9         | 3,308  |
| 7,500                                         | 1,705              | 438                  | 7.4         | 219      | 110    | 5.0         | 2,484  |
| 5,000                                         | 1,137              | 292                  | 7.6         | 146      | 73     | 5.1         | 1,661  |
| 4,000                                         | 910                | 234                  | 7.6         | 117      | 58     | 5.1         | 1,331  |
| 3,000                                         | 682                | 175                  | 7.7         | 88       | 44     | 5.1         | 1,002  |
| 2,000                                         | 455                | 117                  | 7.8         | 58       | 29     | 5.2         | 672    |
| 1,500                                         | 341                | 88                   | 7.8         | 44       | 22     | 5.2         | 507    |
| 1,000                                         | 227                | 58                   | 7.8         | 29       | 15     | 5.2         | 343    |
| 500                                           | 114                | 29                   | 7.9         | 15       | 7      | 5.2         | 178    |
